# Supplementary material for: A Missense LRRK2 Variant Is a Risk Factor for Excessive Inflammatory Responses in Leprosy
Source: PubMed Central journal article supplement (PMC4742274; doi:10.1371/journal.pntd.0004412), 2016-02-04
Supplement: pntd.0004412.s002.pdf [file pntd.0004412.s002.pdf]

**S1 Table 1. Vietnamese family-based sample.**

|                                 | T1R-affected          | T1R-free               |
|---------------------------------|-----------------------|------------------------|
|                                 | 229                   | 229                    |
| <b>Families</b>                 |                       |                        |
| trios                           | 213                   | 189                    |
| 2-sibs                          | 8                     | 20                     |
| <b>Gender</b>                   |                       |                        |
| Male (%)                        | 160 (69.9)            | 162 (70.1)             |
| Female (%)                      | 69 (30.1)             | 67 (29.9)              |
| <b>Clinical subtype</b>         |                       |                        |
| TT                              | 5                     | 5                      |
| Borderline<br>(BT / BB / BL)    | 215<br>(53 / 94 / 68) | 215<br>(111 / 67 / 37) |
| LL                              | 8                     | 8                      |
| I                               | 1                     | 1                      |
| NP                              | -                     | -                      |
| <b>Age at leprosy<br/>onset</b> |                       |                        |
| Mean (SD)                       | 19.9 (7.6)            | 17.9 (7.1)             |

T1R, type-1 reaction; TT, tuberculoid pole; BT, borderline-tuberculoid; BB, borderline-borderline; BL, borderline-lepromatous; LL, lepromatous pole; I, Indeterminate; NP, neural pure; SD, standard deviation.
